# Supplementary material for: Glycodendrimers and Modified ELISAs: Tools to Elucidate Multivalent Interactions of Galectins 1 and 3
Source: Molecules. 2015 Apr 20;20(4):7059–96. doi: 10.3390/molecules20047059 (PMC4513649; doi:10.3390/molecules20047059)
Supplement: Supplementary file 1 [file molecules-20-07059-s001.pdf]

## Supplementary Materials

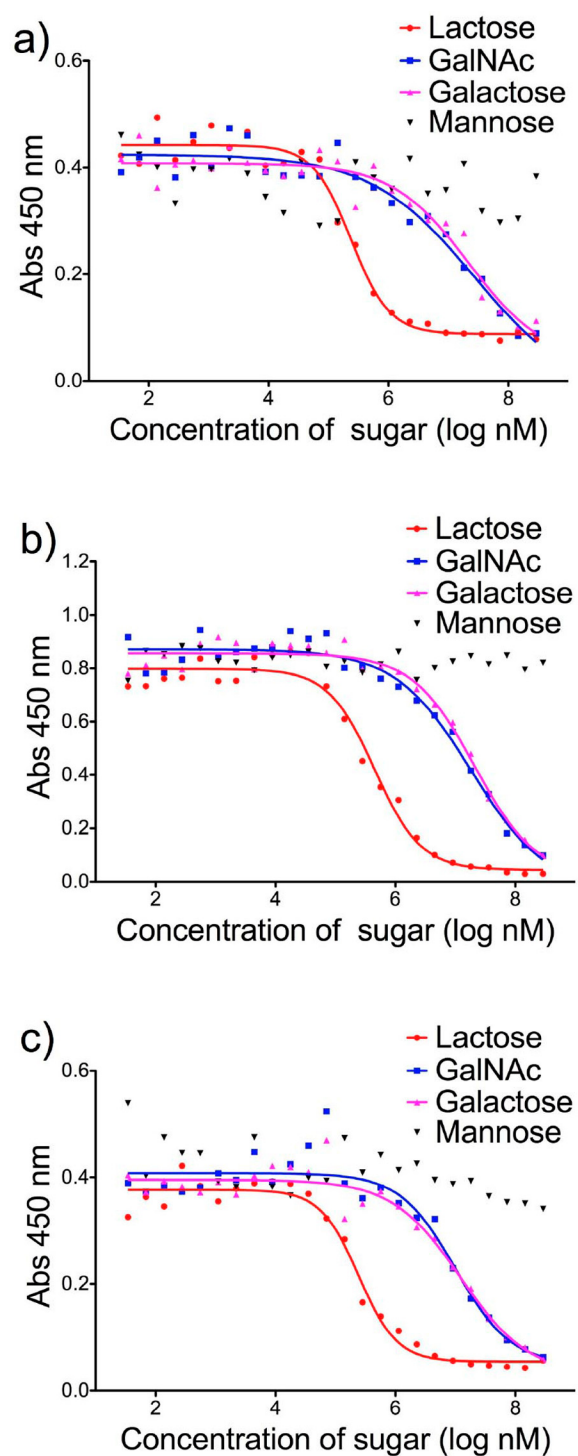

**Figure S1.** ELISA curves with different inhibitors with (a) **4a**; (b) **5a** and (c) **6a**.

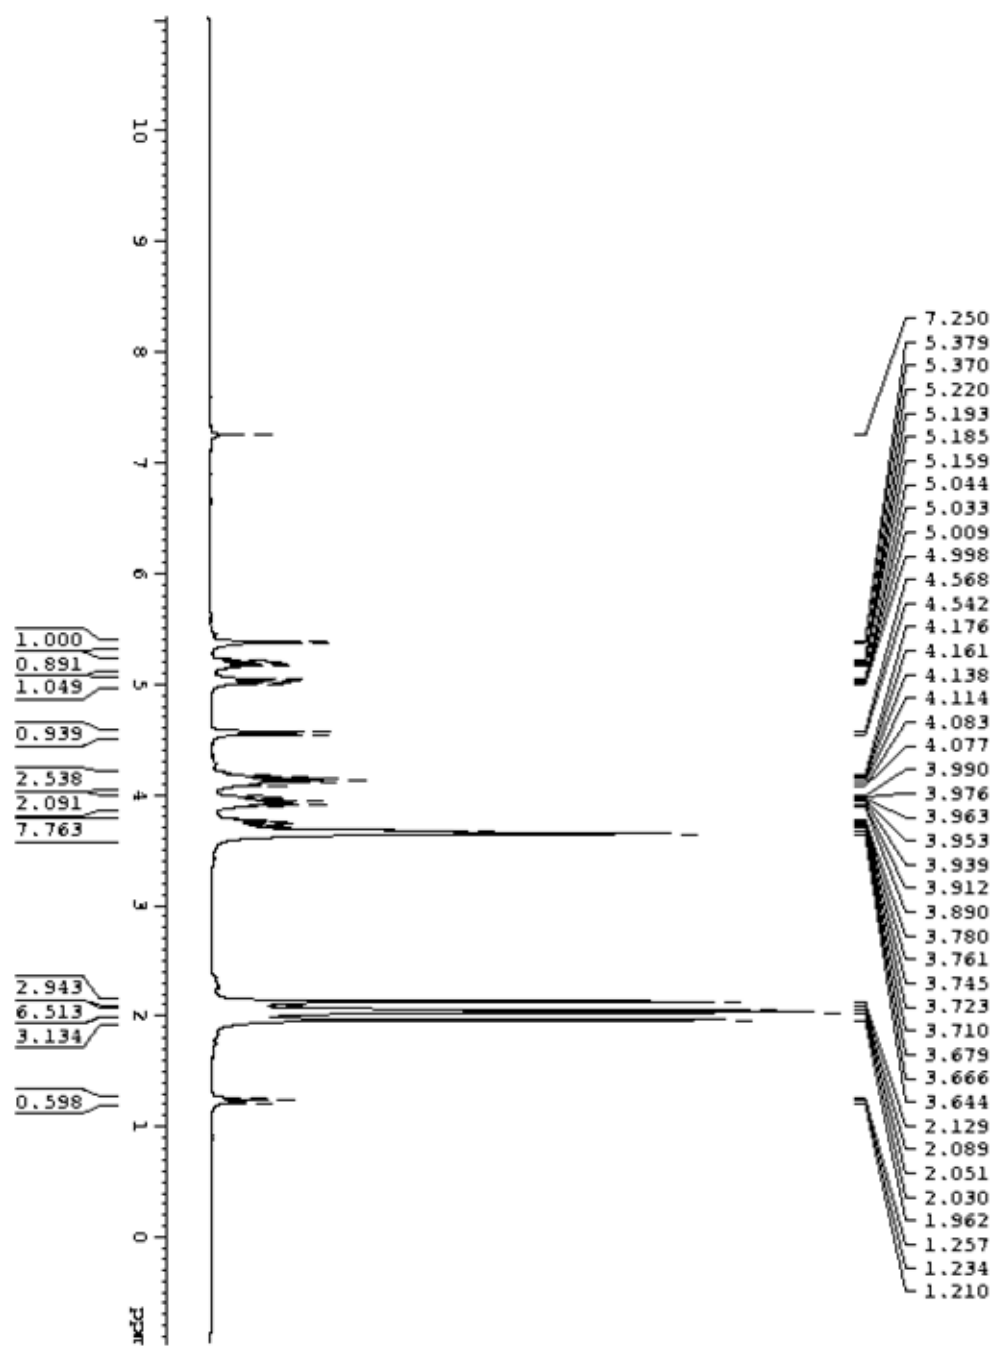

Figure S2.  $^1\text{H}$ -NMR spectrum (300 MHz,  $\text{CDCl}_3$ ) of 1.

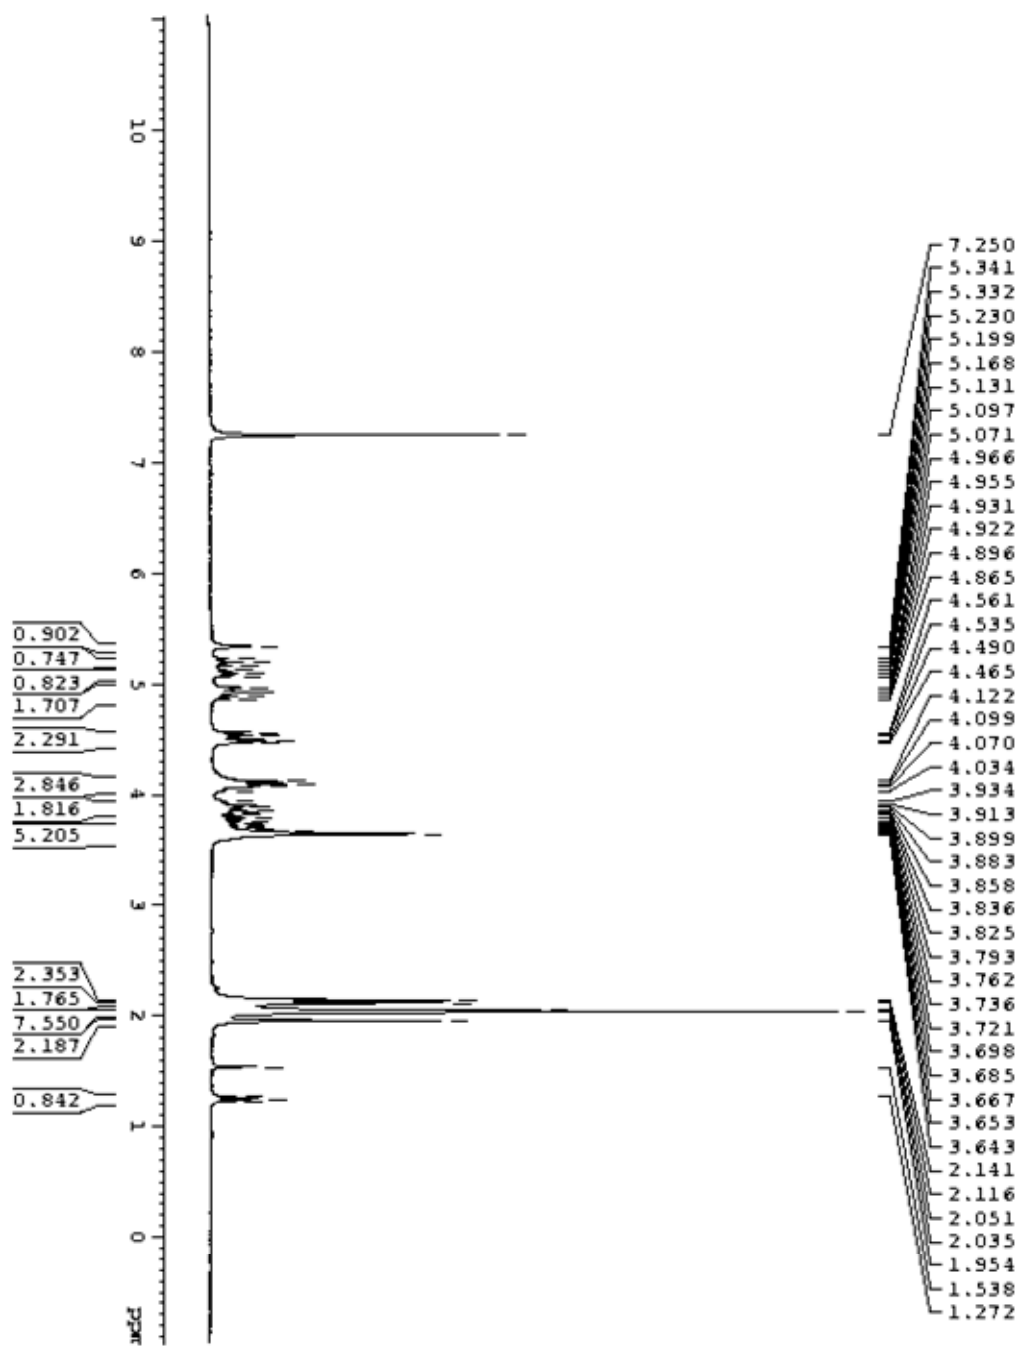

Figure S3. <sup>1</sup>H-NMR spectrum (300 MHz, CDCl<sub>3</sub>) of **3**.

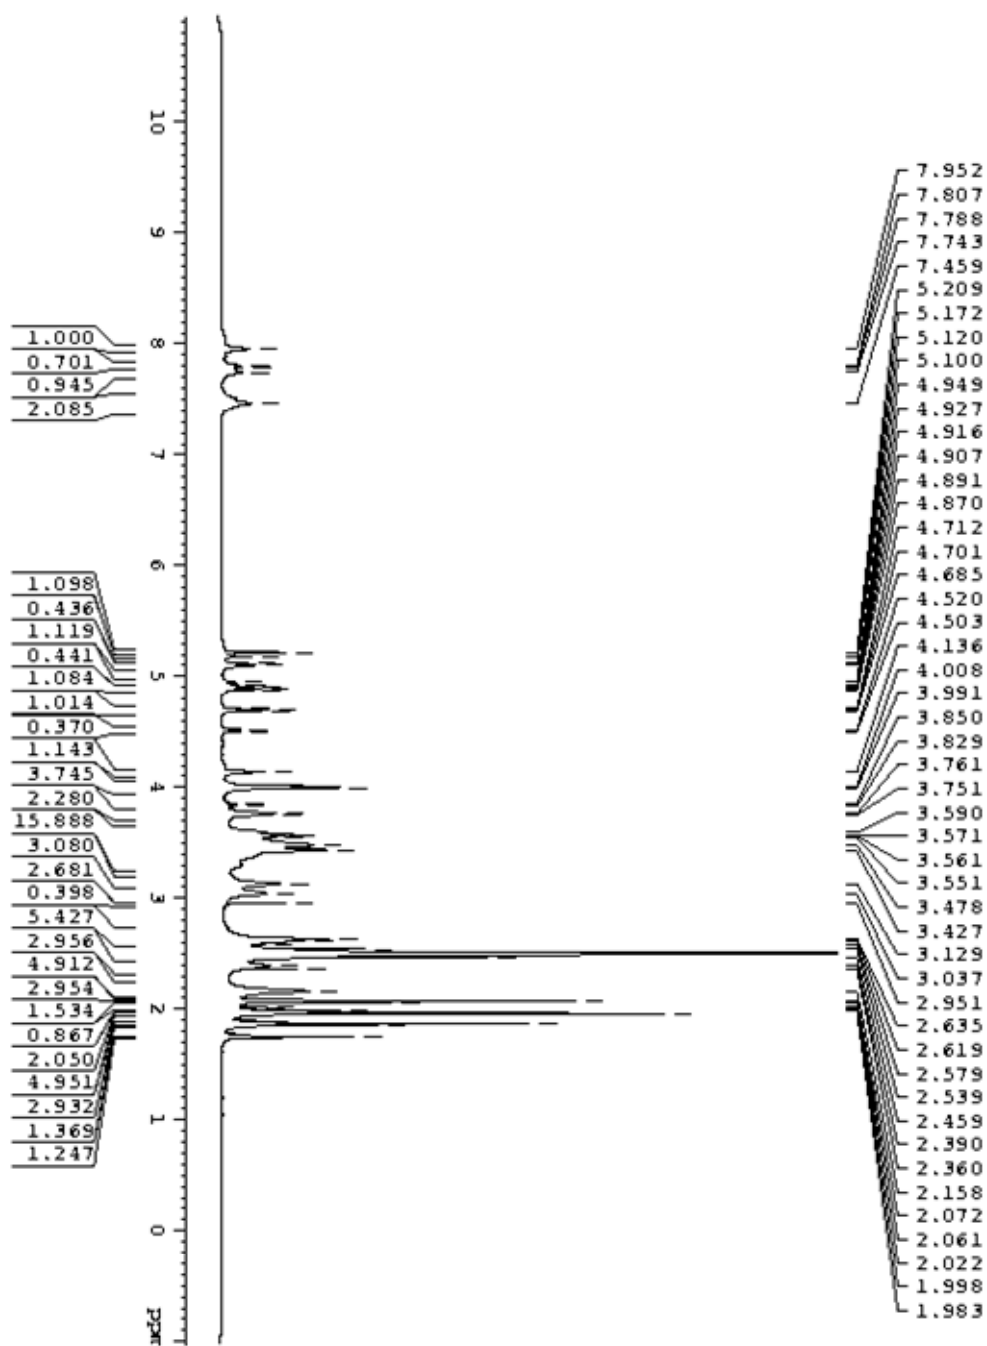

**Figure S4.** <sup>1</sup>H-NMR spectrum (500 MHz, *d*<sub>6</sub>-DMSO) of **7b**. (acetylated).

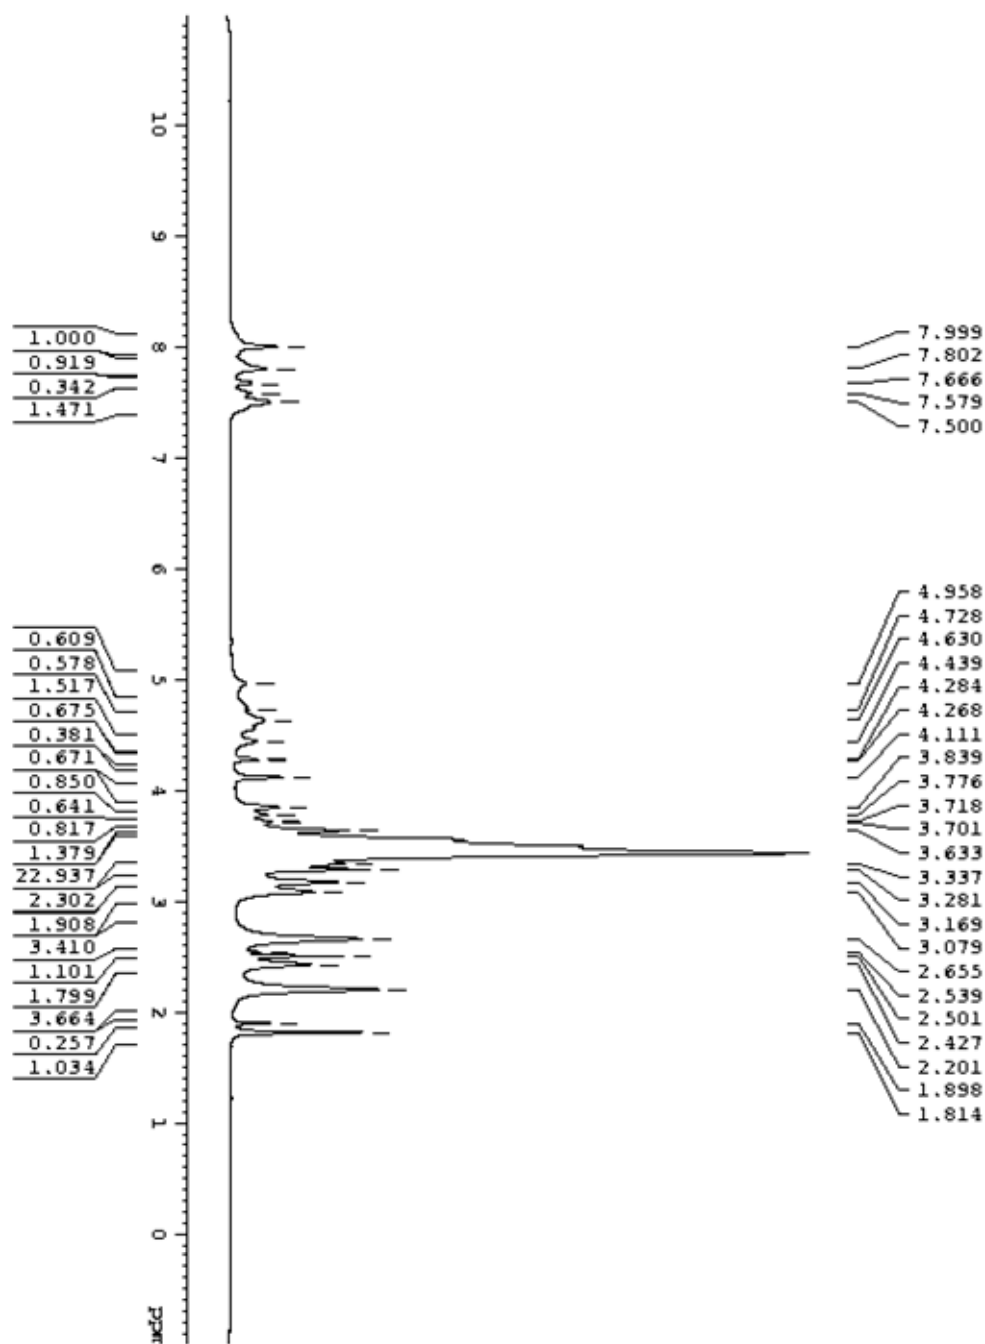

**Figure S5.**  $^1\text{H}$ -NMR spectrum (500 MHz,  $d_6$ -DMSO) of **7b**. (deacetylated).

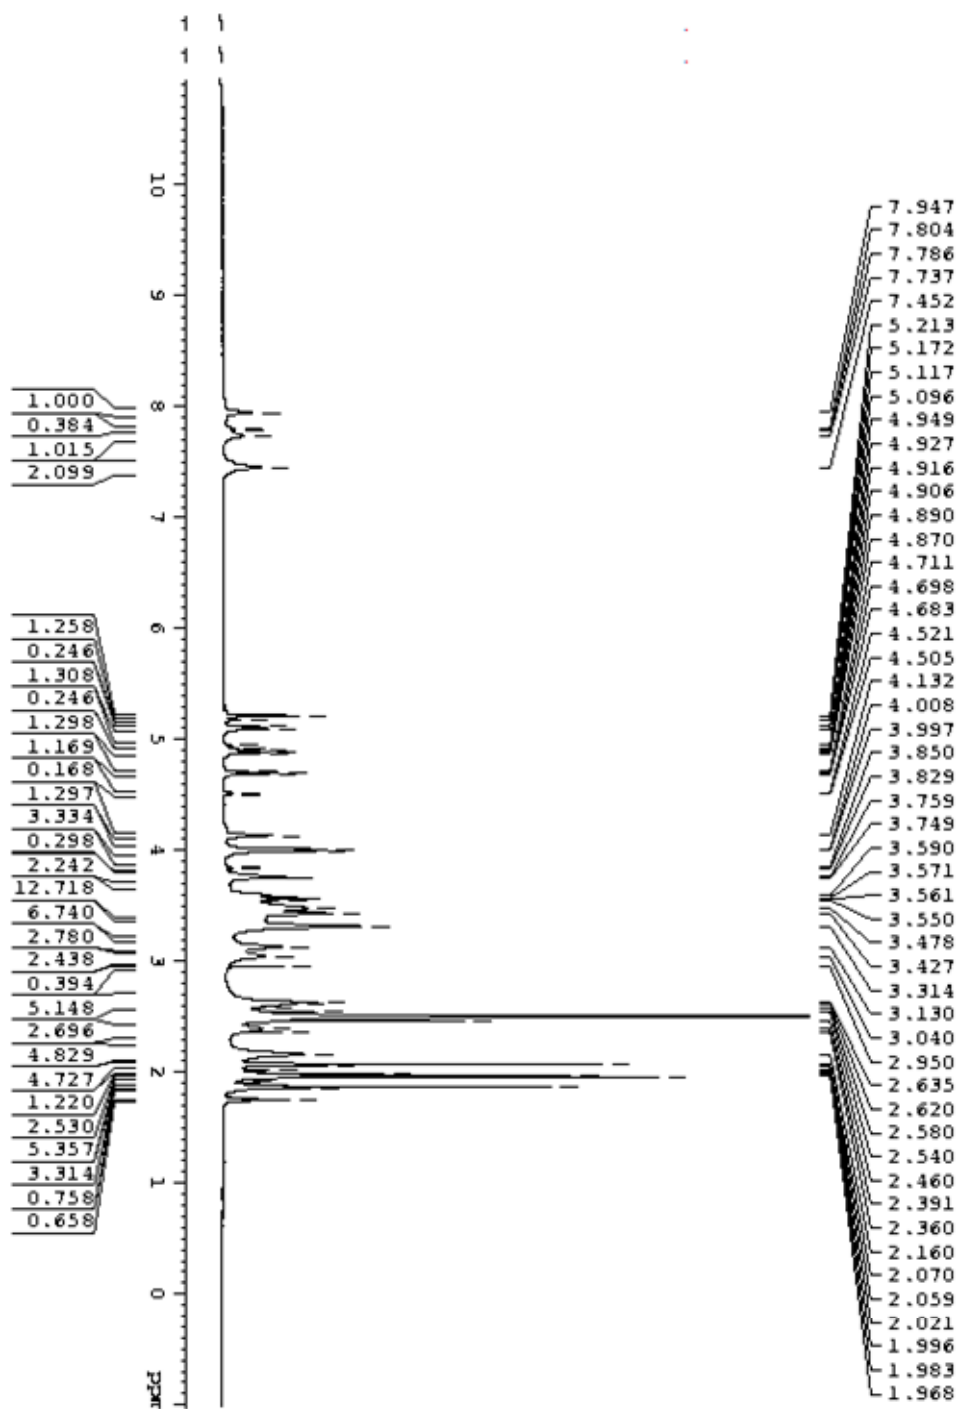

**Figure S6.** <sup>1</sup>H-NMR spectrum (500 MHz, *d*<sub>6</sub>-DMSO) of **8a** (acetylated).

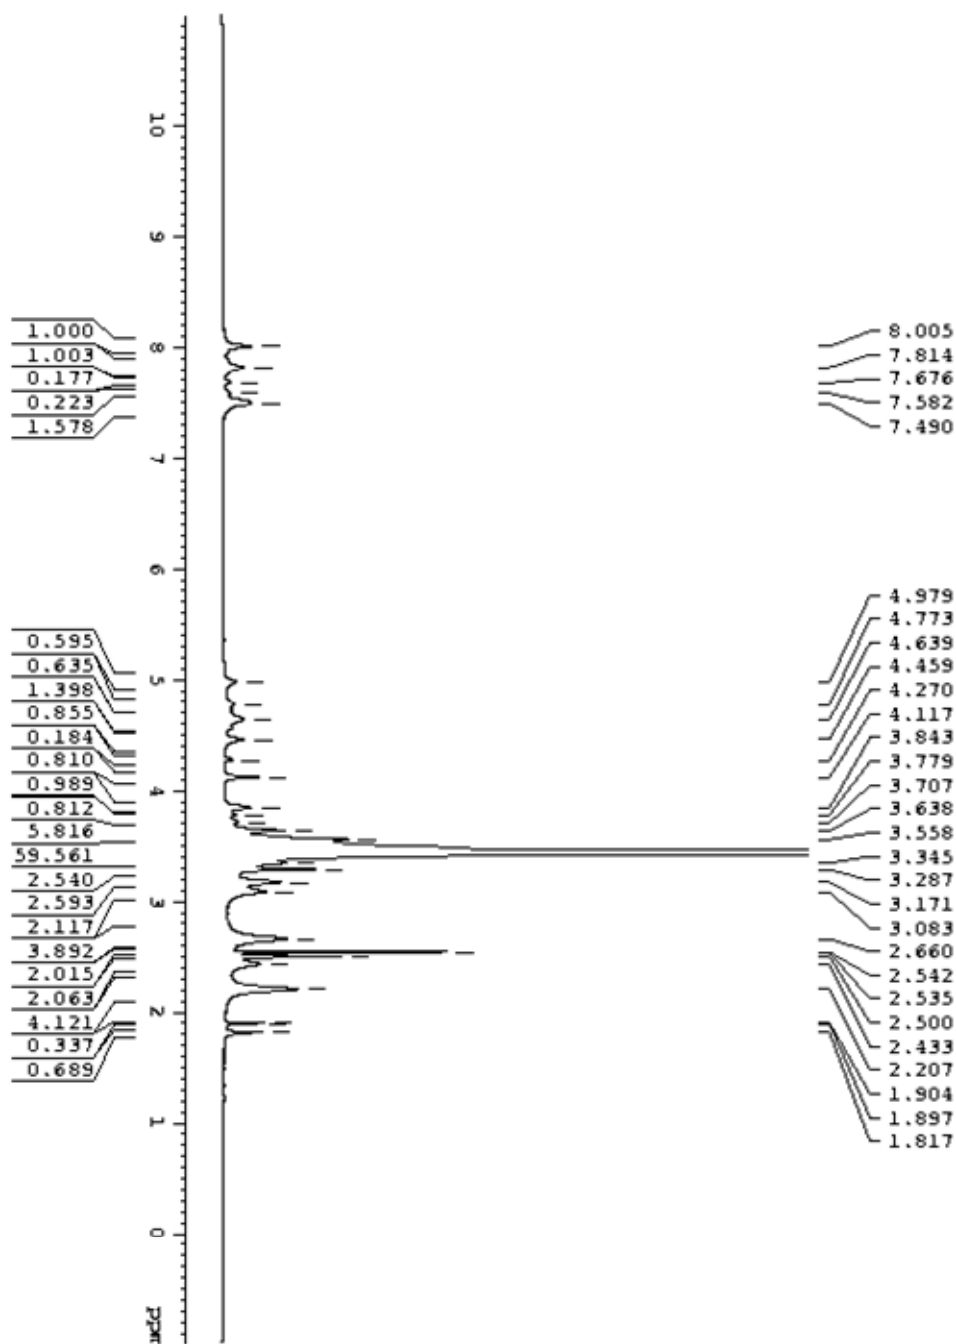

**Figure S7.** <sup>1</sup>H-NMR spectrum (500 MHz, *d*<sub>6</sub>-DMSO) of **8a**. (deacetylated).

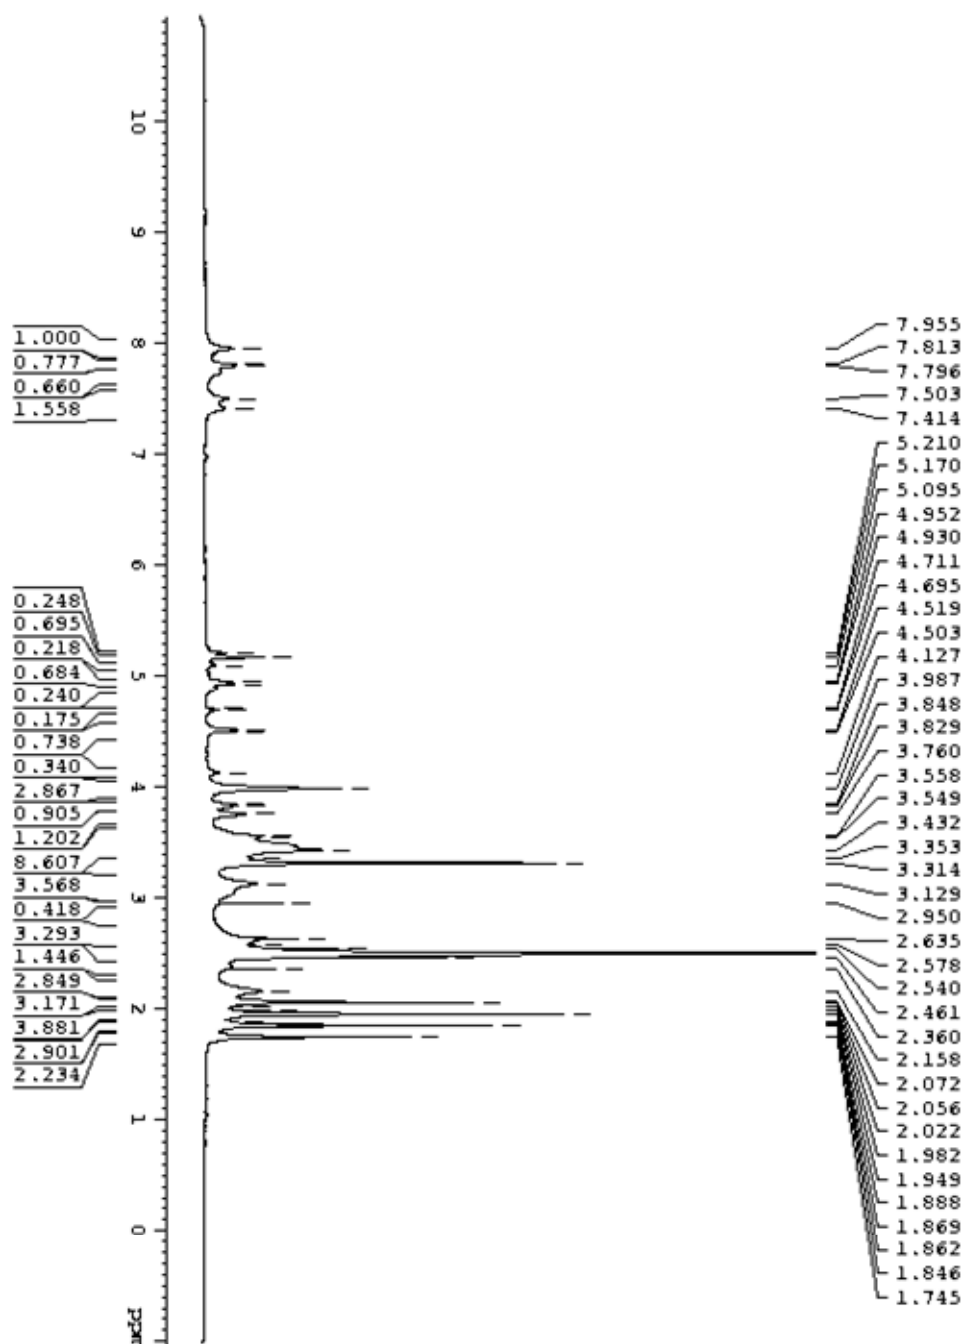

**Figure S8.** <sup>1</sup>H-NMR spectrum (500 MHz, *d*<sub>6</sub>-DMSO) of **9e**. (acetylated).

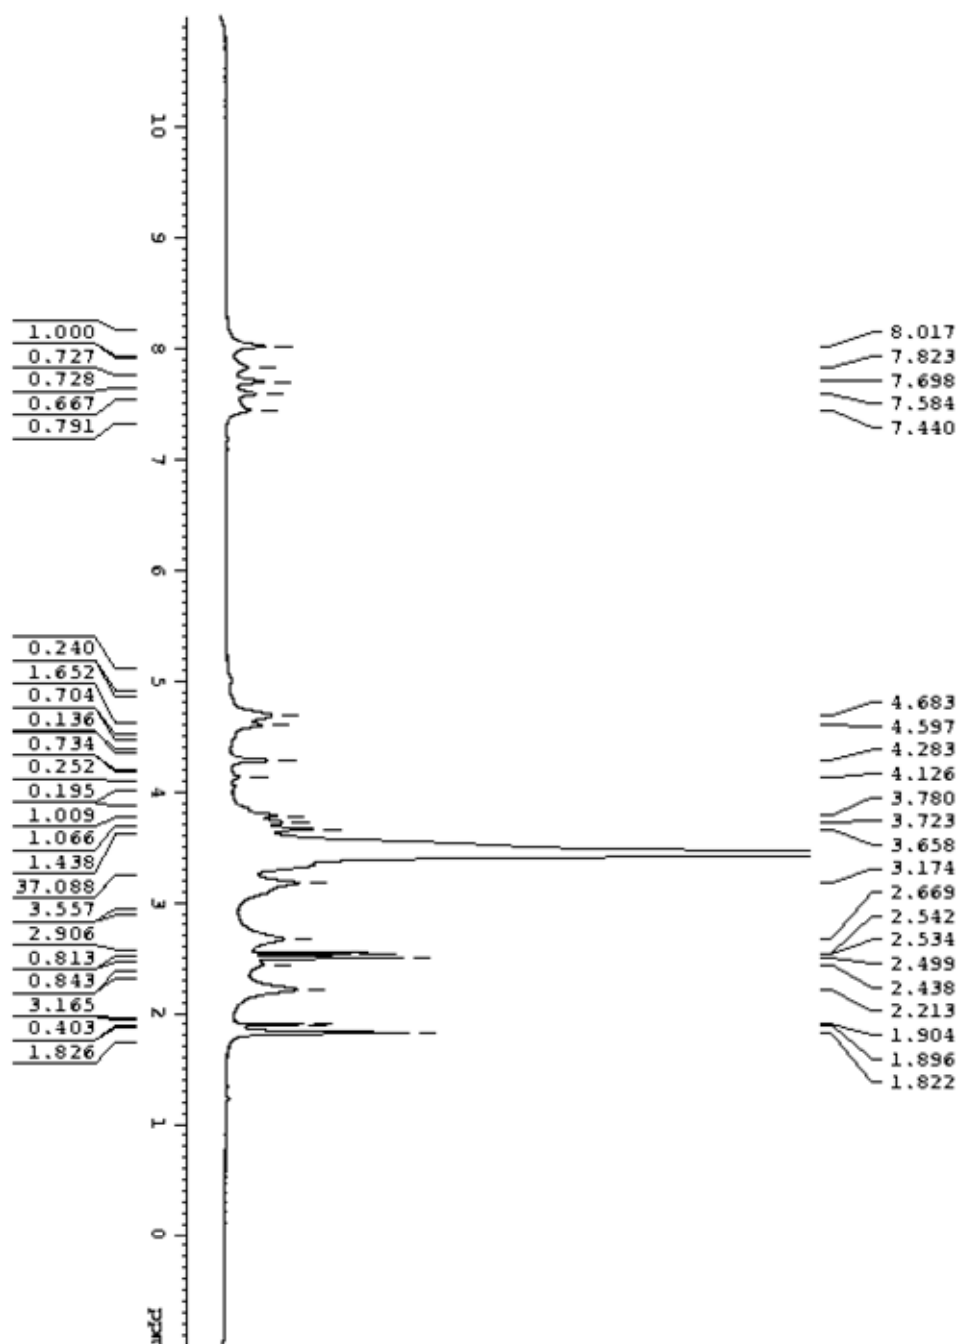

**Figure S9.** <sup>1</sup>H-NMR spectrum (500 MHz, *d*<sub>6</sub>-DMSO) of **9e**. (deacetylated).

High resolution XPS spectra of C 1s, compound **6a**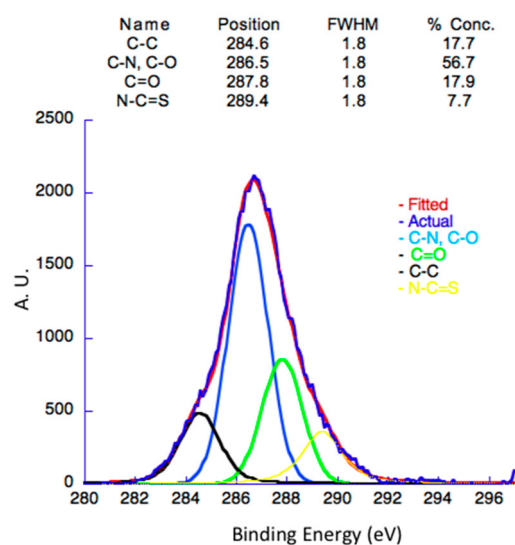High resolution XPS spectra of O 1s, compound **6a**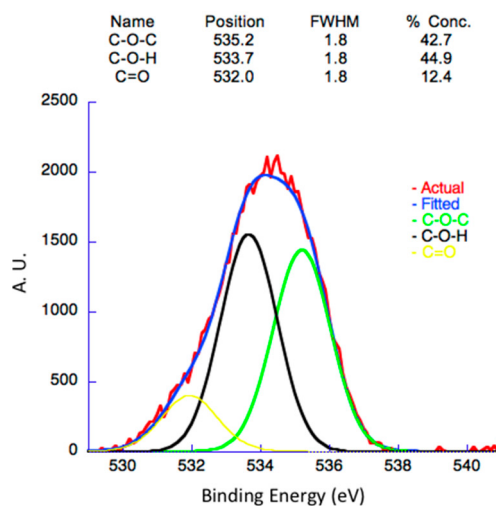High resolution XPS spectra of N 1s, compound **6a**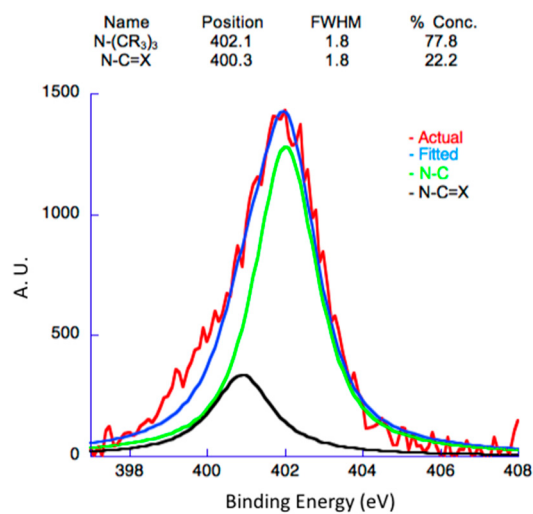**Figure S10.** High resolution XPS spectra for compound **6a**.

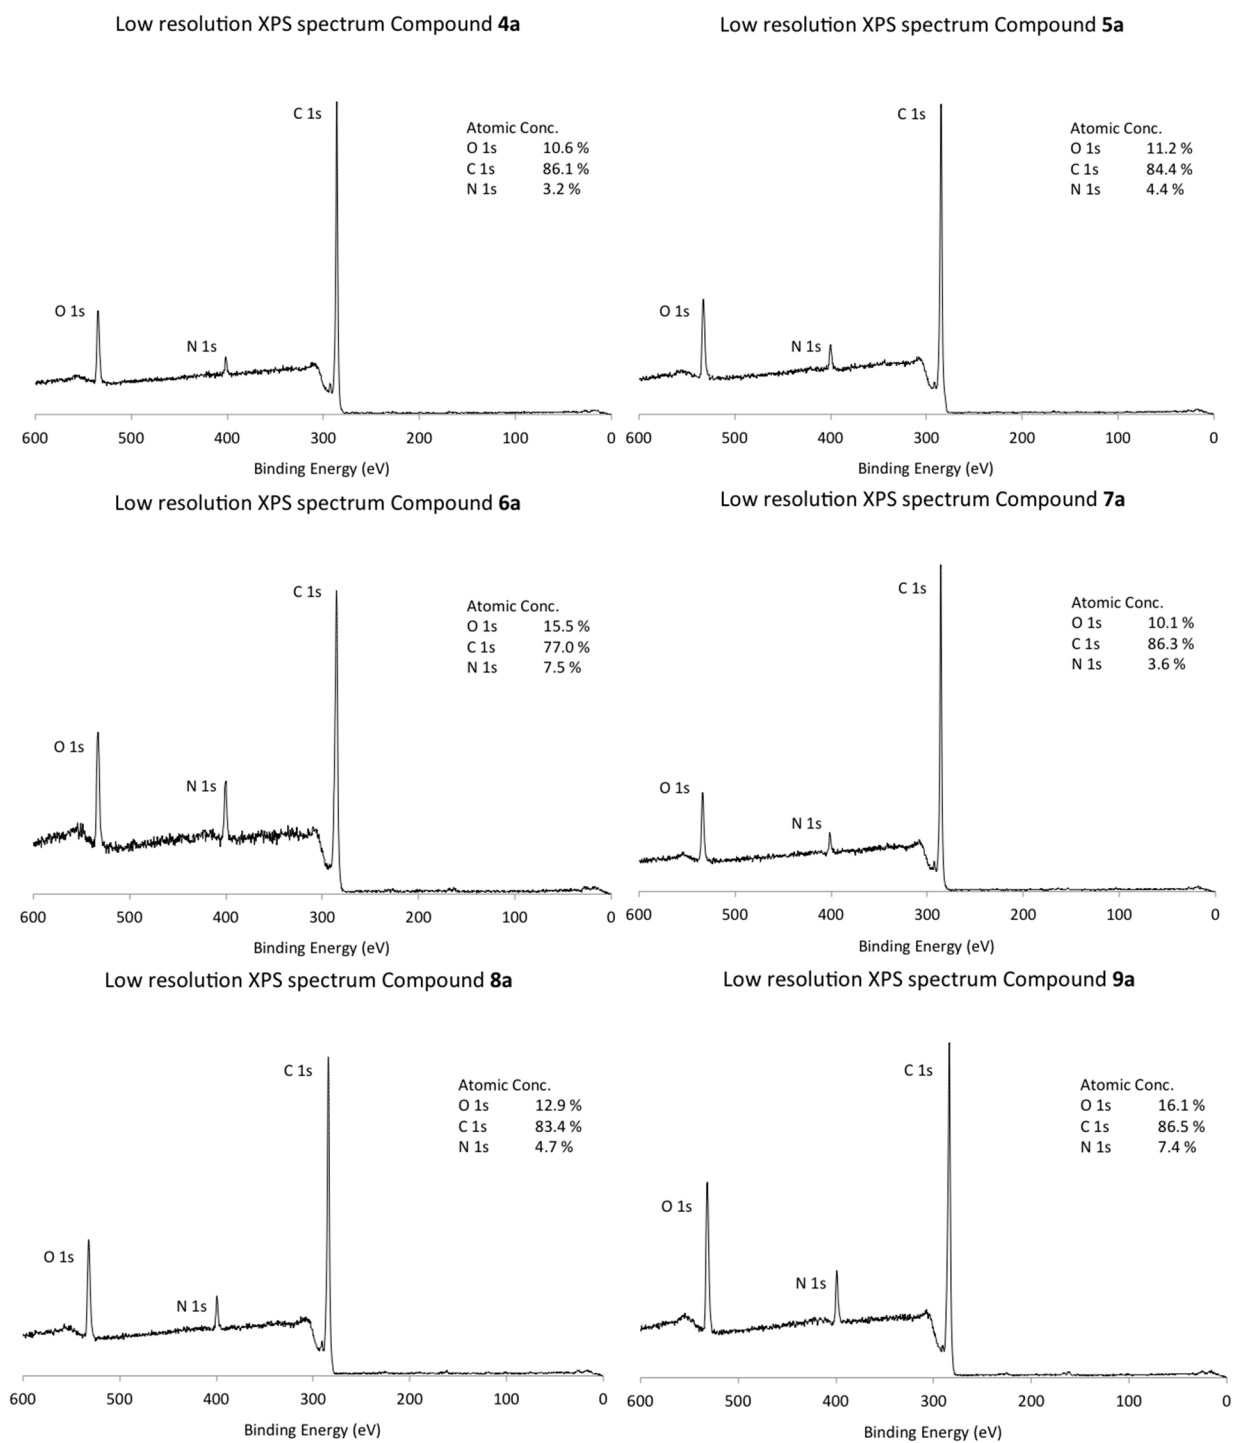**Figure S11.** XPS Spectra, series a.

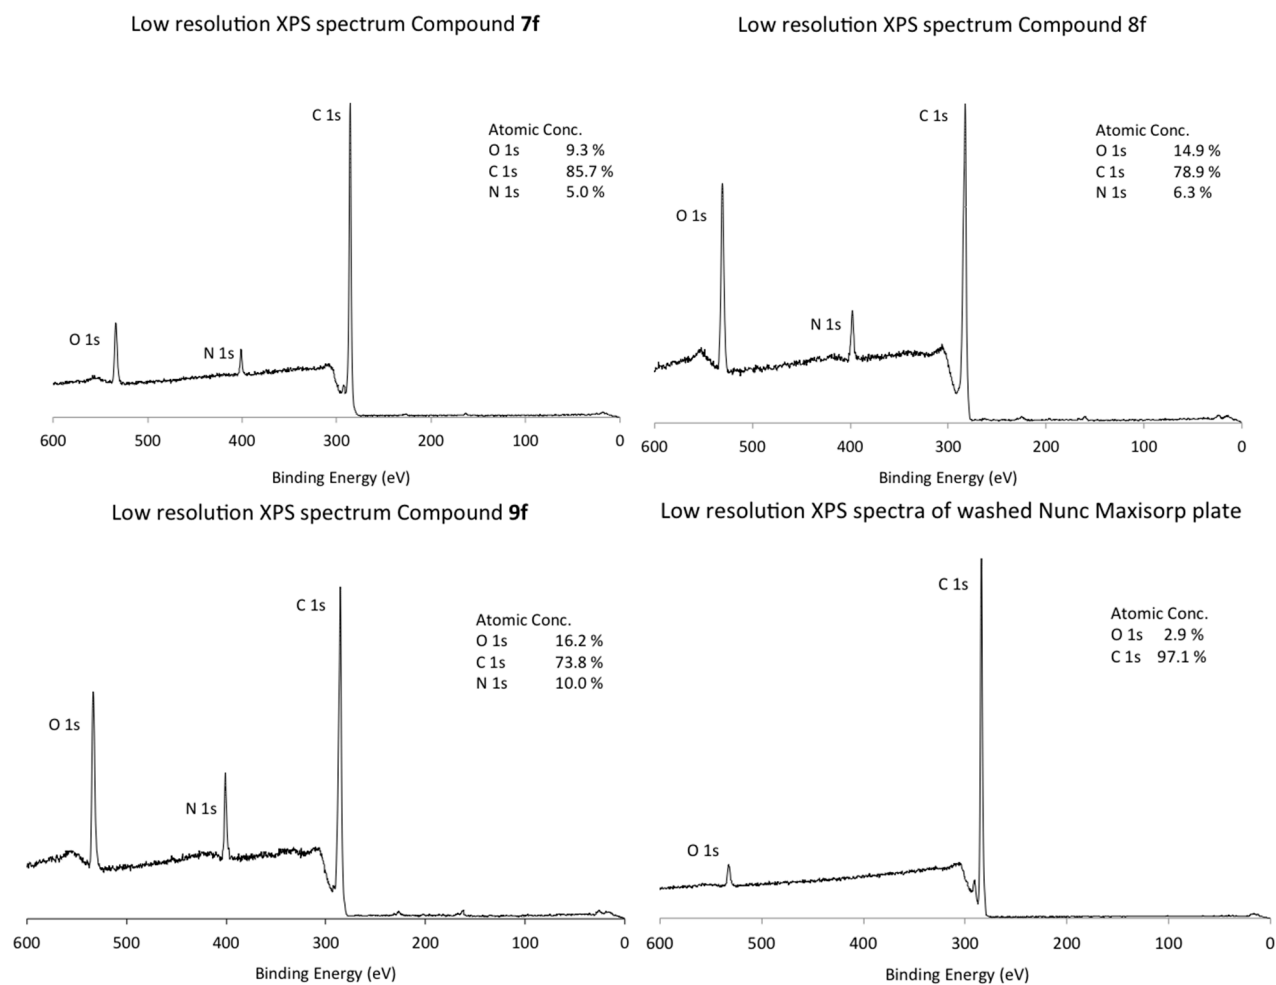

**Figure S12.** XPS Spectra, series **f** and control.
